# Supplementary material for: Rescue of Rare CFTR Trafficking Mutants Highlights a Structural Location-Dependent Pattern for Correction
Source: MDPI journal article supplement (doi:10.3390/ijms24043211), 2023-02-06
Supplement: s1 [file s1]

## Supplementary Information

**Supp Table S1:** List of all TMD1 and NBD1 residues for which there are missense variants reported in CFMDB and CFTR2 and information on their eligibility for FDA-approved modulators. The domain borders were TMD1 – residues 69-390 and NBD1 – residues 391-645 [1].

| TMD1 Residue Numbers | CFMDB Missense Mutations         | CFTR2 Missense Mutations | Eligible for Trikafta    | Eligible for Symdeko     | Eligible for Kalydeco    |
|----------------------|----------------------------------|--------------------------|--------------------------|--------------------------|--------------------------|
| 72                   | A72T<br>A72D                     |                          |                          |                          |                          |
| 74                   | R74W<br>R74Q                     | R74W<br>-                | R74Q<br>-                | R74Q<br>-                | R74Q<br>-                |
| 75                   | R75Q<br>R75L                     | R75Q<br>-                | R75Q<br>-                | R75Q<br>-                | -<br>-                   |
| 79                   | W79R                             |                          |                          |                          |                          |
| 82                   | M82V                             |                          |                          |                          |                          |
| 84                   | Y84H                             |                          |                          |                          |                          |
| 85                   | G85E<br>G85V                     | G85E<br>-                | G85E<br>-                |                          |                          |
| 87                   | F87L<br>F87S                     |                          |                          |                          |                          |
| 88                   | L88S                             |                          |                          |                          |                          |
| 89                   | Y89C                             |                          |                          |                          |                          |
| 90                   | L90S                             |                          |                          |                          |                          |
| 91                   | G91R                             | G91R                     |                          |                          |                          |
| 92                   | E92K<br>E92D                     | E92K<br>-                | E92K<br>-                | E92K<br>-                |                          |
| 98                   | Q98R<br>Q98P                     | Q98R<br>-                | Q98R<br>-                | Q98R<br>-                |                          |
| 99                   | P99L                             | P99L                     |                          |                          |                          |
| 101                  | L101S                            |                          |                          |                          |                          |
| 102                  | L102R<br>L102P                   | L102R<br>-               |                          |                          |                          |
| 105                  | I105N                            |                          |                          |                          |                          |
| 107                  | A107G                            |                          |                          |                          |                          |
| 108                  | S108F                            |                          |                          |                          |                          |
| 109                  | Y109N<br>Y109C                   | -<br>-                   | Y109N<br>-               | Y109N<br>-               |                          |
| 110                  | D110Y<br>D110N<br>D110H<br>D110E | -<br>-<br>D110H<br>D110E | -<br>-<br>D110H<br>D110E | -<br>-<br>D110H<br>D110E | -<br>-<br>D110H<br>D110E |
| 111                  | P111A<br>P111L                   |                          |                          |                          |                          |
| 113                  | N113I                            |                          |                          |                          |                          |
| 116                  | E116K<br>E116Q                   | E116K<br>-               | E116K<br>-               | E116K<br>-               |                          |
| 117                  | R117H<br>R117C                   | R117H<br>R117C           | R117H<br>R117C           | R117H<br>R117C           | R117H<br>R117C           |

|     |                         |                         |                         |                         |                         |
|-----|-------------------------|-------------------------|-------------------------|-------------------------|-------------------------|
|     | R117G<br>R117L<br>R117P | R117G<br>R117L<br>R117P | R117G<br>R117L<br>R117P | R117G<br>R117L<br>R117P | R117G<br>R117L<br>R117P |
| 119 | I119V                   |                         |                         |                         |                         |
| 120 | A120T<br>A120V          | A120T<br>-              | A120T<br>-              | A120T<br>-              | A120T<br>-              |
| 122 | Y122H<br>Y122C          |                         |                         |                         |                         |
| 124 | G124R                   |                         |                         |                         |                         |
| 125 | I125T                   |                         |                         |                         |                         |
| 126 | G126D                   | G126D                   | G126D                   | G126D                   |                         |
| 130 | L130V                   |                         |                         |                         |                         |
| 131 | I132M                   |                         |                         |                         |                         |
| 137 | L137R<br>L137H<br>L137P |                         |                         |                         |                         |
| 139 | H139R<br>H139L          | H139R<br>-              | H139R<br>-              |                         |                         |
| 140 | P140S<br>P140L          |                         |                         |                         |                         |
| 141 | A141D                   |                         |                         |                         |                         |
| 145 | L145H                   |                         |                         |                         |                         |
| 146 | H146R                   |                         |                         |                         |                         |
| 148 | I148T<br>I148N          | I148T<br>-              | I148T<br>-              | I148T<br>-              | I148T<br>-              |
| 149 | G149R<br>G149V          |                         |                         |                         |                         |
| 151 | Q151K                   |                         |                         |                         |                         |
| 152 | M152L<br>M152V<br>M152R | -<br>-<br>-             | -<br>M152V<br>-         | -<br>M152V<br>-         | -<br>M152V<br>-         |
| 155 | A155P                   |                         |                         |                         |                         |
| 158 | S158R<br>S158N<br>S158T |                         |                         |                         |                         |
| 159 | L159S                   |                         |                         |                         |                         |
| 161 | Y161D<br>Y161N<br>Y161S | Y161D<br>-<br>-         | -<br>-<br>Y161S         |                         |                         |
| 162 | K162E                   |                         |                         |                         |                         |
| 163 | K163T                   |                         |                         |                         |                         |
| 164 | T164A                   |                         |                         |                         |                         |
| 165 | L165S                   | L165S                   | L165S                   |                         |                         |
| 166 | K166Q                   |                         |                         |                         |                         |
| 170 | R170H<br>R170G<br>R170C | R170H                   | R170H                   | R170H                   | R170H                   |
| 174 | I175V                   |                         |                         |                         |                         |
| 177 | I177T<br>I177T          |                         |                         |                         |                         |
| 178 | G178R<br>G178E          | G178R<br>-              | G178R<br>-              | G178R<br>-              | G178R<br>-              |
| 179 | Q179K                   |                         |                         |                         |                         |

|     |                         |                 |                 |                |                |
|-----|-------------------------|-----------------|-----------------|----------------|----------------|
| 183 | L183I                   |                 |                 |                |                |
| 186 | N186K                   |                 |                 |                |                |
| 187 | N187K                   |                 |                 |                |                |
| 189 | N189S<br>N189K          |                 |                 |                |                |
| 191 | -                       | F191V           | F191V           | F191V          |                |
| 192 | D192G<br>D192N          | D192G<br>-      | D192G<br>-      | D192G<br>-     | D192G<br>-     |
| 193 | E193K                   | E193K           | E193K           | E193K          | E193K          |
| 194 | G194V<br>G194R          | G194V<br>G194R  | G194V<br>G194R  | G194V<br>G194R | -<br>G194R     |
| 198 | A198P<br>A198T          |                 |                 |                |                |
| 199 | H199Y<br>H199R<br>H199Q | H199Y<br>-<br>- | H199Y<br>-<br>- |                |                |
| 200 | F200I                   |                 |                 |                |                |
| 201 | V201M                   | V201M           | V201M           | V201M          |                |
| 205 | P205S<br>P205R          | P205S<br>-      | P205S<br>-      |                |                |
| 206 | L206W<br>L206F          | L206W<br>-      | L206W<br>-      | L206W<br>-     | L206W<br>-     |
| 209 | A209S                   |                 |                 |                |                |
| 210 | L210P                   |                 |                 |                |                |
| 213 | G213V                   |                 |                 |                |                |
| 216 | W216C                   |                 |                 |                |                |
| 217 | E217G                   |                 |                 |                |                |
| 220 | Q220R                   |                 |                 |                |                |
| 225 | C225R                   |                 |                 |                |                |
| 227 | L227R                   | L227R           |                 |                |                |
| 232 | V232D                   | V232D           | V232D           | V232D          | V232D          |
| 233 | L233F                   |                 |                 |                |                |
| 234 | -                       | -               | -               | A234D          | A234D          |
| 237 | Q237E<br>Q237H          | Q237E<br>-      | Q237E<br>Q237H  | Q237E<br>Q237H | Q237E<br>Q237H |
| 238 | A238V                   |                 |                 |                |                |
| 239 | G239R                   |                 |                 |                |                |
| 241 | G241R                   |                 |                 |                |                |
| 243 | M243L                   |                 |                 |                |                |
| 244 | M244K                   |                 |                 |                |                |
| 248 | R248T                   |                 |                 |                |                |
| 257 | E257K                   |                 |                 |                |                |
| 258 | R258G                   | R258G           | R258G           | R258G          |                |
| 265 | M265R                   | M265R           | M265R           | M265R          |                |
| 277 | W277R                   |                 |                 |                |                |
| 279 | E279D                   |                 |                 |                |                |
| 281 | M281T                   |                 |                 |                |                |

|     |                                  |                          |                              |                              |                          |
|-----|----------------------------------|--------------------------|------------------------------|------------------------------|--------------------------|
| 282 | E282D                            |                          |                              |                              |                          |
| 285 | I285F                            |                          |                              |                              |                          |
| 287 | N287Y                            |                          |                              |                              |                          |
| 292 | E292K                            |                          |                              |                              |                          |
| 293 | L293M                            |                          |                              |                              |                          |
| 299 | A299T                            |                          |                              |                              |                          |
| 301 | Y301C                            |                          |                              |                              |                          |
| 305 | F305V                            |                          |                              |                              |                          |
| 307 | S307N                            |                          |                              |                              |                          |
| 309 | A309T<br>A309G<br>A309D<br>A309V |                          |                              |                              |                          |
| 311 | F311L                            | F311L                    | F311L                        | F311L                        | F311L                    |
| 314 | G314E<br>G314R<br>G314V          | G314E<br>-<br>-          | G314E<br>-<br>-              | G314E<br>-<br>-              | G314E<br>-<br>-          |
| 316 | F316L                            |                          |                              |                              |                          |
| 317 | V317A                            |                          |                              |                              |                          |
| 320 | L320V<br>L320F                   | L320V<br>-               | L320V<br>-                   | L320V<br>-                   | L320V<br>-               |
| 321 | S321P                            |                          |                              |                              |                          |
| 322 | V322A                            |                          |                              |                              |                          |
| 324 | P324L                            |                          |                              |                              |                          |
| 325 | Y325C                            |                          |                              |                              |                          |
| 327 | L327R                            |                          |                              |                              |                          |
| 331 | I331N                            |                          |                              |                              |                          |
| 333 | L333F                            |                          |                              |                              |                          |
| 334 | R334W<br>R334Q<br>R334L          | R334W<br>R334Q<br>R334L  | -<br>R334Q<br>R334L          | -<br>R334Q<br>R334L          | -<br>R334Q<br>R334L      |
| 336 | I336K                            | I336K                    | I336K                        | I336K                        |                          |
| 338 | T338I<br>T338A                   | T338I                    | T338I                        | T338I                        | T338I                    |
| 340 | I340N                            |                          |                              |                              |                          |
| 341 | S341P                            | S341P                    | S341P                        |                              |                          |
| 346 | L346P                            | L346P                    | L346P                        | L346P                        |                          |
| 347 | R347P<br>R347H<br>R347C<br>R347L | R347P<br>R347H<br>-<br>- | R347P<br>R347H<br>-<br>R347L | R347P<br>R347H<br>-<br>R347L | -<br>R347H<br>-<br>R347L |
| 348 | M348V<br>M348T<br>M348K          |                          |                              |                              |                          |
| 349 | A349V                            | A349V                    | A349V                        | A349V                        | A349V                    |
| 351 | T351I<br>T351S                   |                          |                              |                              |                          |
| 352 | R352Q<br>R352W<br>R352G          | R352Q<br>R352W<br>-      | R352Q<br>R352W<br>-          | R352Q<br>R352W<br>-          | R352Q<br>-<br>-          |

| 353                  | Q353H                         |                              |                                 |                                |                                 |
|----------------------|-------------------------------|------------------------------|---------------------------------|--------------------------------|---------------------------------|
| 355                  | P355S                         |                              |                                 |                                |                                 |
| 356                  | W356S                         |                              |                                 |                                |                                 |
| 359                  | Q359R                         | Q359R                        | Q359R                           | Q359R                          | Q359R                           |
| 360                  | T360R                         |                              |                                 |                                |                                 |
| 361                  | W361R                         |                              | W361R                           |                                |                                 |
| 364                  | S364P                         |                              |                                 |                                |                                 |
| 365                  | L365P                         |                              |                                 |                                |                                 |
| 369                  | N369Y                         |                              |                                 |                                |                                 |
| 373                  | D373E                         |                              |                                 |                                |                                 |
| 375                  | L375F                         |                              |                                 |                                |                                 |
| 378                  | Q378R                         |                              |                                 |                                |                                 |
| 379                  | E379K                         |                              |                                 |                                |                                 |
| 383                  | L383S                         |                              |                                 |                                |                                 |
| 388                  | T388M                         |                              |                                 |                                |                                 |
|                      | <b>204</b> Missense Mutations | <b>54</b> Missense Mutations | <b>53</b> approved for Trikafta | <b>47</b> approved for Symdeko | <b>32</b> approved for Kalydeco |
|                      |                               |                              |                                 |                                |                                 |
| NBD1 Residue Numbers | CFMDB Missense Mutations      | CFTR2 Missense Mutations     | Eligible for Trikafta           | Eligible for Symdeko           | Eligible for Kalydeco           |
| 392                  | V392G<br>V392A                |                              |                                 |                                |                                 |
| 394                  | M394R                         |                              |                                 |                                |                                 |
| 399                  | A399D<br>A399V                |                              |                                 |                                |                                 |
| 403                  | E403D                         | -                            | E403D                           | E403D                          |                                 |
| 407                  | E407V                         |                              |                                 |                                |                                 |
| 416                  | N416S                         |                              |                                 |                                |                                 |
| 418                  | N418S                         |                              |                                 |                                |                                 |
| 424                  | G424S                         |                              |                                 |                                |                                 |
| 431                  | S431G                         |                              |                                 |                                |                                 |
| 439                  | P439S                         |                              |                                 |                                |                                 |
| 443                  | D443Y                         | D443Y                        | D443Y                           | D443Y                          |                                 |
| 444                  | I444T                         |                              |                                 |                                |                                 |
| 452                  | Q452P                         |                              |                                 |                                |                                 |
| 453                  | -                             | L453S                        | L453S                           |                                |                                 |
| 455                  | A455E                         | A455E                        | A455E                           | A455E                          | A455E                           |
| 456                  | V456A<br>V456F                | V456A<br>-                   | V456A<br>V456F                  |                                |                                 |
| 458                  | G458V                         | -                            | G458V                           |                                |                                 |
| 463                  | G463V                         |                              |                                 |                                |                                 |
| 464                  | K464N                         |                              |                                 |                                |                                 |
| 466                  | S466L                         |                              |                                 |                                |                                 |
| 467                  | L467P                         | L467P                        |                                 |                                |                                 |

|     |                         |                     |                     |                     |                     |
|-----|-------------------------|---------------------|---------------------|---------------------|---------------------|
| 468 | L468P                   |                     |                     |                     |                     |
| 469 | M469V                   |                     |                     |                     |                     |
| 470 | M470V                   | M470V               |                     |                     |                     |
| 474 | E474K                   | E474K               | E474K               |                     |                     |
| 480 | G480S<br>G480C<br>G480D | -<br>-<br>-         | -<br>G480C<br>-     |                     |                     |
| 484 | H484Y<br>H484R          |                     |                     |                     |                     |
| 485 | S485C<br>S485T          |                     |                     |                     |                     |
| 491 | C491R                   |                     |                     |                     |                     |
| 492 | S492F                   | S492F               |                     |                     |                     |
| 493 | Q493P<br>Q493R          |                     |                     |                     |                     |
| 497 | I497V                   |                     |                     |                     |                     |
| 498 | M498I                   |                     |                     |                     |                     |
| 499 | P499A                   |                     |                     |                     |                     |
| 501 | T501A                   |                     |                     |                     |                     |
| 502 | I502T<br>I502N          | I502T               |                     |                     |                     |
| 504 | E504Q                   |                     |                     |                     |                     |
| 506 | I506L<br>I506S<br>I506T |                     |                     |                     |                     |
| 508 | F508S<br>F508C          | -<br>F508C          | -<br>F508C          | -<br>F508C          | -<br>F508C          |
| 513 | D513G                   | D513G               |                     |                     |                     |
| 515 | Y515H                   |                     |                     |                     |                     |
| 516 | R516G                   |                     |                     |                     |                     |
| 517 | Y517C                   |                     |                     |                     |                     |
| 519 | S519G                   |                     |                     |                     |                     |
| 520 | V520F<br>V520I          | V520F               |                     |                     |                     |
| 527 | E527Q<br>E527G          |                     |                     |                     |                     |
| 528 | E528K<br>E528D          |                     |                     |                     |                     |
| 529 | D529H<br>D529G          |                     |                     |                     |                     |
| 534 | A534E                   |                     |                     |                     |                     |
| 536 | K536E                   |                     |                     |                     |                     |
| 537 | D537E                   |                     |                     |                     |                     |
| 539 | I539T                   |                     |                     |                     |                     |
| 542 | G542E                   |                     |                     |                     |                     |
| 544 | G544S<br>G544SV         |                     |                     |                     |                     |
| 548 | L548Q                   |                     |                     |                     |                     |
| 549 | S549N<br>S549R<br>S549I | S549N<br>S549R<br>- | S549N<br>S549R<br>- | S549N<br>S549R<br>- | S549N<br>S549R<br>- |

|     |                                  |                              |                 |                 |                 |
|-----|----------------------------------|------------------------------|-----------------|-----------------|-----------------|
| 550 | G550R                            |                              |                 |                 |                 |
| 551 | G551S<br>G551D                   | G551S<br>G551D               | G551S<br>G551D  | G551S<br>G551D  | G551S<br>G551D  |
| 552 | Q552K                            |                              |                 |                 |                 |
| 553 | G553G<br>G553Q                   | -<br>-                       | G553G<br>G553Q  | G553G<br>G553Q  | G553G<br>G553Q  |
| 555 | R555G                            |                              |                 |                 |                 |
| 556 | I556V                            | -                            | I556V           | I556V           | I556V           |
| 558 | L558S                            | L558S                        |                 |                 |                 |
| 559 | A559T<br>A559V<br>A559E          | A559T<br>-<br>-              |                 |                 |                 |
| 560 | R560K<br>R560T<br>R560S<br>R560G | R560K<br>R560T<br>R560S<br>- |                 |                 |                 |
| 561 | A561E                            | A561E                        |                 |                 |                 |
| 562 | V562I<br>V562L                   | V562I                        | V562I           | V562I           | V562I           |
| 563 | Y563N<br>Y563D<br>Y563C          | Y563N<br>Y563D<br>-          | Y563N<br>-<br>- |                 |                 |
| 565 | D565G                            |                              |                 |                 |                 |
| 566 | A566T                            |                              |                 |                 |                 |
| 568 | L568F                            |                              |                 |                 |                 |
| 569 | Y569D<br>Y569H<br>Y569C          | Y569D                        |                 |                 |                 |
| 571 | L571S                            |                              |                 |                 |                 |
| 572 | D572N                            |                              |                 |                 |                 |
| 573 | S573C                            |                              |                 |                 |                 |
| 574 | P574H<br>P574S                   | P574H                        | P574H           |                 |                 |
| 575 | -                                | P575Y                        | P575Y           | P575Y           |                 |
| 576 | G576A                            | G576A                        |                 |                 |                 |
| 577 | Y577F                            |                              |                 |                 |                 |
| 579 | D579G<br>D579Y<br>D579A          | D579G<br>-<br>-              | D579G<br>-<br>- | D579G<br>-<br>- | D579G<br>-<br>- |
| 582 | T582S<br>T582R<br>T582I          |                              |                 |                 |                 |
| 586 | I586V                            |                              |                 |                 |                 |
| 587 | F587I                            |                              |                 |                 |                 |
| 588 | E588V                            | E588V                        | E588V           | E588V           |                 |
| 589 | S589I<br>S589N                   | -<br>-                       | -<br>S589N      | -<br>S589N      | -<br>S589N      |
| 594 | L594P                            |                              |                 |                 |                 |
| 595 | M595T                            |                              |                 |                 |                 |
| 600 | R600G                            |                              |                 |                 |                 |
| 601 | I601F                            | I601F                        | I601F           | I601F           |                 |

|     |                                              |                                             |                                    |                                   |                                    |
|-----|----------------------------------------------|---------------------------------------------|------------------------------------|-----------------------------------|------------------------------------|
| 603 | V603F                                        |                                             |                                    |                                   |                                    |
| 604 | T604S<br>T604I                               |                                             |                                    |                                   |                                    |
| 608 | E608G                                        |                                             |                                    |                                   |                                    |
| 609 | H609R<br>H609L                               | H609R                                       |                                    |                                   |                                    |
| 610 | L610S                                        |                                             |                                    |                                   |                                    |
| 613 | A613T                                        | A613T                                       |                                    |                                   |                                    |
| 614 | D614G<br>D614Y                               | D614G                                       | D614G                              | D614G                             |                                    |
| 618 | I618T                                        | I618T                                       | I618T                              | I618T                             |                                    |
| 619 | L619S                                        |                                             |                                    |                                   |                                    |
| 620 | H620P<br>H620Q                               |                                             |                                    |                                   |                                    |
| 622 | G622D                                        | G622D                                       | G622D                              | G622D                             |                                    |
| 628 | G628R                                        | G628R                                       | G628R                              |                                   |                                    |
| 633 | L633I<br>L633P                               |                                             |                                    |                                   |                                    |
| 636 | L636P                                        |                                             |                                    |                                   |                                    |
| 639 | D639Y                                        |                                             |                                    |                                   |                                    |
|     | <b>144</b> Missense<br>Mutations in<br>CFTR1 | <b>38</b> Missense<br>Mutations in<br>CFTR2 | <b>29</b> approved<br>for Trikafta | <b>20</b> approved for<br>Symdeko | <b>12</b> approved for<br>Kalydeco |



**Supp Table S2:** Mutations eligible for treatment with Trikafta, organized by their structural localization.

| <b>TMD1</b> | <b>NBD1</b> |
|-------------|-------------|
| R74Q        | S364P*      |
| R74W        | E403D*      |
| R75Q        | D443Y       |
| G85E        | L453S       |
| E92K        | A455E       |
| Q98R        | V456A       |
| Y109N*      | V456F       |
| D110E       | G463V*      |
| D110H       | E474K       |
| E116K       | G480C*      |
| R117C       | S492F       |
| R117G       | I502T       |
| R117H       | F508C       |
| R117L       | S549N       |
| R117P       | S549R       |
| A120T       | G551D       |
| G126D       | G551S       |
| H139R       | R553Q*      |
| I148T       | A554E*      |
| M152V*      | V562I       |
| Y161D       | Y563N       |
| Y161S*      | P574H       |
| L165S       | F575Y       |
| R170H       | G576A       |
| I175V*      | D579G       |
| G178E       | E588V       |
| G178R*      | S589N*      |
| F191V       | I601F       |
| D192G       | D614G       |
| E193K       | I618T       |
| G194R       | G622D       |
| G194V       | G628R       |
| H199Y       |             |
| V201M       |             |
| P205S       |             |
| L206W       |             |
| V232D       |             |
| A234D*      |             |
| Q237E       |             |
| Q237H       |             |
| R258G       |             |
| M265R       |             |
| F311L       |             |
| G314E       |             |

L320V  
 R334L  
 R334Q  
 I336K  
 T338I  
 S341P  
 L346P  
 R347H  
 R347L\*  
 R347P  
 A349V  
 R352Q  
 R352W  
 Q359R  
 W361R\*

\*Mutations that are not listed in CFTR2 but are eligible for treatment with Trikafta.

**Supp Table S3:** Average of Predicted  $\Delta\Delta G$  (kcal/mol) of CFTR mutants grouped by domain or presence of band C, using as template CFTR in an “open” conformation (6msm) or a “closed” conformation (5uak) by FoldX.

| CFTR Structure | TMD1<br>(kcal/mol)                                  | NBD1<br>(kcal/mol)      |
|----------------|-----------------------------------------------------|-------------------------|
| <b>6msm</b>    | $1.42 \pm 2,17$<br>( $0.74 \pm 0.75$ ) <sup>a</sup> | $3.92 \pm 2,11$         |
| <b>5uak</b>    | $0.05 \pm 1.33$                                     | $2.04 \pm 1.42$         |
| <b>7svd</b>    | $0.85 \pm 1.73$                                     | $3.24 \pm 2.04$         |
| <b>7sv7</b>    | $1.28 \pm 2.59$                                     | $3.28 \pm 1.27$         |
|                | Band C on WB<br>(kcal/mol)                          | No band C<br>(kcal/mol) |
| <b>7svd</b>    | $0.06 \pm 1,7$                                      | $2.61 \pm 1.81$         |
| <b>7sv7</b>    | $0.5 \pm 1.3$                                       | $3.1 \pm 2.4$           |

<sup>a</sup>excluding H199Y

**Supp Table S4:** Predicted  $\Delta\Delta G$  Values ( $(\Delta G(\text{Mutant}) - \Delta G(\text{WT}))$  (kcal/mol) for TMD1 and NBD1 Mutations Included in Trikafta Label Extension using FoldX

| <b>Mutation</b> | <b>Suak (Stability)</b> | <b>Suak (St dev)</b> | <b>6msm (Stability)</b> | <b>6msm (St dev)</b> |
|-----------------|-------------------------|----------------------|-------------------------|----------------------|
| NBD1 A455E      | 1.5763                  | 0.7597               | 4.0114                  | 0.64                 |
| NBD1 A554E      | 1.4002                  | 0.1041               | 0.236                   | 0.1067               |
| NBD1 A559E      | 1.3211                  | 0.1106               | -3.5394                 | 3.1282               |
| NBD1 A559T      | 0.1632                  | 0.0407               | 2.2631                  | 0.2985               |
| NBD1 D443Y      | 0.1062                  | 0.0186               | 0.1818                  | 0.04                 |
| NBD1 D579G      | 3.144                   | 0.0201               | 7.5868                  | 0.1749               |
| NBD1 D614G      | 1.2118                  | 0.0385               | 0.8793                  | 0.1258               |
| NBD1 E403D      | n a                     |                      | -0.0162                 | 0.1036               |
| NBD1 E474K      | 0.2788                  | 0.408                | 4.4381                  | 0.1402               |
| NBD1 E588V      | 0.7775                  | 0.0225               | 0.9543                  | 0.0789               |
| NBD1 F508C      | 2.5552                  | 0.1453               | 3.8415                  | 0.1022               |
| NBD1 F575Y      | 0.4399                  | 0.0035               | 1.0677                  | 0.077                |
| NBD1 G463V      | 4.9169                  | 0.2451               | 9.6047                  | 0.5372               |
| NBD1 G480C      | 13.6899                 | 0.2278               | 7.8955                  | 0.4019               |
| NBD1 G551D      | 0.6893                  | 0.404                | -0.264                  | 0.3628               |
| NBD1 G551S      | -0.391                  | 0.0302               | 0.7114                  | 0.2572               |
| NBD1 G576A      | 0.1315                  | 0                    | 1.194                   | 0.2509               |
| NBD1 G622D      | 8.3989                  | 1.7263               | 9.0118                  | 1.0153               |
| NBD1 G628R      | 4.0647                  | 0.3954               | 4.772                   | 0.3108               |
| NBD1 I502T      | 1.6982                  | 0.2821               | 2.3214                  | 0.0103               |
| NBD1 I601F      | 4.1107                  | 1.2853               | 7.4605                  | 1.808                |
| NBD1 I618T      | 2.8814                  | 0.0278               | 3.0459                  | 0.0228               |
| NBD1 L453S      | 3.1488                  | 0.3557               | 2.0766                  | 0.1579               |
| NBD1 L558S      | 2.7257                  | 0.0171               | 3.4256                  | 0.032                |
| NBD1 L571S      | 3.9392                  | 0.0358               | 4.0449                  | 0.0177               |
| NBD1 P574H      | 10.6698                 | 1.6585               | 9.5251                  | 2.8674               |
| NBD1 R553Q      | -0.2087                 | 0.2402               | 0.2829                  | 0.4342               |
| NBD1 R560S      | 2.297                   | 0.4656               | 2.9713                  | 0.4293               |
| NBD1 R560T      | 2.0602                  | 0.7007               | 2.4006                  | 0.4085               |
| NBD1 S364P      | 4.3212                  | 0.1224               | 1.8036                  | 0.1496               |
| NBD1 S492F      | 1.3467                  | 1.7247               | 1.8168                  | 2.201                |
| NBD1 S549N      | 0.2327                  | 0.0359               | 0.3806                  | 0.0212               |
| NBD1 S549R      | 0.5838                  | 0.0294               | 2.3309                  | 0.2354               |
| NBD1 S589N      | -0.8194                 | 0.1589               | -0.9522                 | 0.0855               |
| NBD1 V456A      | 2.6094                  | 0.0119               | 3.5611                  | 0.0135               |
| NBD1 V456F      | -1.5743                 | 0.618                | 3.7544                  | 0.2646               |
| NBD1 V520T      | 1.5901                  | 0.1844               | 1.0251                  | 0.0281               |
| NBD1 V562I      | -1.2051                 | 0.0389               | 0.1643                  | 0.3743               |
| NBD1 Y563C      | 2.5108                  | 0.1269               | 4.0229                  | 0.0235               |
| NBD1 Y563D      | 3.6309                  | 0.0848               | 5.8036                  | 0.1669               |

|              |         |        |         |        |
|--------------|---------|--------|---------|--------|
| NBD1 Y563N   | 2.6965  | 0.2326 | 4.36    | 0.0908 |
| TMD1 A120T   | 1.8068  | 0.3823 | 0.7154  | 0.035  |
| TMD1 A234D   | 1.2419  | 0.0213 | 1.1334  | 0.1443 |
| TMD1 A349V   | -0.4124 | 0.2572 | -0.1847 | 0.3963 |
| TMD1 D110E   | -0.4889 | 0.0299 | 2.4576  | 0.1694 |
| TMD1 D110H   | -0.9811 | 0.0892 | 2.7622  | 0.3966 |
| TMD1 D192G   | -0.8954 | 0.0028 | 1.4327  | 0.3309 |
| TMD1 E116K   | 0.2889  | 0.029  | 0.1381  | 0.3976 |
| TMD1 E193K   | -0.6951 | 0.197  | -0.6568 | 0.0791 |
| TMD1 E92K    | 0.8048  | 0.1889 | 0.687   | 0.1    |
| TMD1 F191V   | 1.8287  | 0.0734 | 2.5149  | 0.1048 |
| TMD1 F311L   | 1.5719  | 0.0749 | 1.521   | 0.0222 |
| TMD1 G126D   | -0.5228 | 0.0149 | -0.7177 | 0.0054 |
| TMD1 G178E   | -1.7629 | 0.033  | 8.3889  | 0.5584 |
| TMD1 G178R   | -0.4146 | 0.082  | 8.7156  | 0.9432 |
| TMD1 G194R   | -0.6242 | 0.2414 | 0.9186  | 0.5597 |
| TMD1 G194V   | 0.5744  | 0.0322 | 1.0694  | 0.092  |
| TMD1 G314E   | 2.3742  | 1.2442 | 3.3991  | 1.501  |
| TMD1 G85E    | 6.3274  | 1.6215 | 7.5798  | 3.9914 |
| TMD1 G85V    | 5.5853  | 1.1353 | 6.1319  | 0.274  |
| TMD1 H139R   | 0.0966  | 0.6405 | 0.3745  | 0.763  |
| TMD1 H199Y   | -0.5756 | 0.2405 | 6.8882  | 1.3511 |
| TMD1 I148T   | 2.654   | 0.0099 | 1.8169  | 0.0292 |
| TMD1 I175V   | 0.0036  | 0.0217 | 1.1325  | 0.0193 |
| TMD1 I336K   | 1.0109  | 0.1153 | 1.0965  | 0.0164 |
| TMD1 I507del | -0.0095 | 0.001  | 0.0019  | 0.009  |
| TMD1 L165S   | 2.1245  | 0.0726 | 2.7067  | 0.0277 |
| TMD1 L206W   | 0.9964  | 0.0922 | 0.3394  | 0.039  |
| TMD1 L227R   | 1.9968  | 0.068  | 2.019   | 0.0409 |
| TMD1 L320V   | 0.9638  | 0.0575 | 0.5538  | 0.1091 |
| TMD1 L346P   | 3.8677  | 0.032  | 6.9786  | 0.1703 |
| TMD1 M152V   | 3.0114  | 0.0998 | 1.2121  | 0.0411 |
| TMD1 M265R   | 2.2353  | 0.1561 | 4.5782  | 0.5768 |
| TMD1 P205S   | 2.2695  | 0.0433 | 1.7467  | 0.0267 |
| TMD1 Q237E   | 1.2363  | 0.0683 | 2.6141  | 0.0103 |
| TMD1 Q237H   | 1.6295  | 0.137  | 3.4684  | 0.1704 |
| TMD1 Q359R   | -0.0258 | 0.1564 | 0.5079  | 0.2225 |
| TMD1 Q98R    | 1.6757  | 0.4027 | 0.2388  | 0.1037 |
| TMD1 R117C   | 1.8401  | 0.0172 | 1.4479  | 0.0478 |
| TMD1 R117G   | 2.0626  | 0.0171 | 1.4268  | 0.0272 |
| TMD1 R117H   | 1.8541  | 0.0597 | 1.2424  | 0.0604 |
| TMD1 R117L   | -0.0864 | 0.2104 | 1.3621  | 0.0916 |
| TMD1 R117P   | 1.2011  | 0.3126 | -0.8031 | 0.0523 |

|            |         |        |         |        |
|------------|---------|--------|---------|--------|
| TMD1 R170H | 0.2852  | 0.0343 | 1.6571  | 0.0604 |
| TMD1 R258G | 2.0202  | 0.5967 | 2.8737  | 0.1938 |
| TMD1 R334L | -0.4534 | 0.0666 | -1.003  | 0.2993 |
| TMD1 R334Q | 0.1935  | 0.036  | -0.4469 | 0.351  |
| TMD1 R347H | 0.5532  | 0.4779 | 1.6534  | 0.887  |
| TMD1 R347L | -1.3477 | 0.4136 | -1.7737 | 0.7172 |
| TMD1 R347P | 5.0759  | 0.4681 | 3.7924  | 0.6891 |
| TMD1 R352G | 2.365   | 0.2348 | 2.4914  | 0.189  |
| TMD1 R352Q | -0.5294 | 0.254  | 1.7828  | 0.0751 |
| TMD1 R352W | -0.204  | 0.995  | 0.8487  | 0.2653 |
| TMD1 R74Q  | 0.4641  | 0.097  | 0.9096  | 0.1308 |
| TMD1 R74W  | -1.2432 | 0.4668 | -0.4917 | 0.173  |
| TMD1 R75G  | 1.7596  | 0.1079 | 0.8242  | 0.1956 |
| TMD1 R75Q  | 2.3412  | 0.0835 | 0.6495  | 0.4119 |
| TMD1 S341P | -0.5575 | 0.0878 | 3.2122  | 0.0589 |
| TMD1 T338I | -1.2658 | 0.0032 | -0.765  | 0.0183 |
| TMD1 V201M | -1.5268 | 0.0278 | -0.6928 | 0.1311 |
| TMD1 V232D | -0.0706 | 0.009  | -0.5106 | 0.0021 |
| TMD1 W361R | -0.4082 | 0.331  | 0.7489  | 0.2629 |
| TMD1 W57G  | 3.9261  | 0.0576 | 5.4808  | 0.0557 |
| TMD1 Y109N | 1.9018  | 0.0458 | 2.2713  | 0.0103 |
| TMD1 Y161D | 4.5467  | 0.1193 | 5.0481  | 0.1072 |
| TMD1 Y161S | 2.9198  | 0.1086 | 4.143   | 0.1154 |

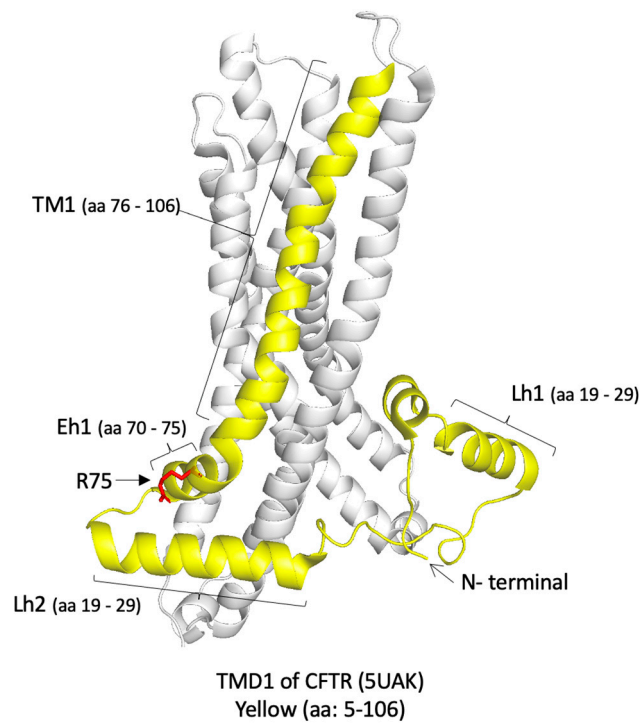

**Supp Figure S1:** N-terminal region of CFTR, with elbow helix region (Eh1), immediately ahead of TM1 and close to lasso motif 2 (Lh2). Part of TMD1 is also visible in grey. Residue R75 is represented in red.

## Additional information on the mutations studied

In R75G, the positively charged arginine amino acid is replaced by the small and hydrophobic glycine. R75 forms a salt bridge with E56 and interacts with E60, and these bonds participate in a network linking TMD1 to the lasso lh2, ICL1, and ICL4 [2]. R75 has been identified [2] as a residue possibly contributing to a tight network of salt bridges that allows the accommodation of VX-809 at the identified TMD1 binding site, also influencing the allosteric coupling between TMD1 and NBD1.

In H139R, the basic amino acid histidine is changed to the basic amino acid arginine, and it was first described in an Italian patient [3]. The first attempt to rescue this mutant was made by Loo et al. [4] when they tested a novel quinazoline derivative to promote maturation and trafficking of misprocessed CFTR variants, although no effect on maturation was observed – probably due to the introduction of a bulky and highly charged residue at this position causing a large thermodynamic hurdle in the folding process. Data obtained after transient expression of COS-1 cells [5] show that H139R abolishes CFTR processing and decreases in the ability to transport Cl<sup>-</sup>. Currently, H139R is part of the Trikafta label extension in the US.

I148T was first reported in a Canadian CF patient with pancreatic insufficiency [6]. The conserved I148 hydrophobic residue located in the ICL1 of CFTR (Figure 2) is replaced by the polar amino acid threonine. This mutation is considered a severe CF mutation because some patients bearing it, had classic CF with pancreatic insufficiency [6-8]. However, a study focused on understanding the different CF phenotypes of many individuals carrying I148T concluded that this mutation is associated with CF disease only if another mutation, 3199del6 (a deletion of ATAGTG from nucleotide 3199, located at CFTR exon 17a) is found in *cis*, forming a complex allele, while healthy adults who were either homozygous or heterozygous for I148T did not carry the deletion [9]. Although there is little doubt that 3199del6 is a deleterious CF mutation, the clinical significance of I148T in the absence of 3199del6 is unclear [10]. According to CFTR2, I148T is classified as non-CF-causing, but this variant is included in the Trikafta label extension granted by FDA [11].

Previous characterization of I148T reported maturation and anion conduction similar to CFTR WT when transiently expressed in HEK293 and COS-1 cells, respectively [5,12]. In primary cultures of nasal epithelial cells (HNE) obtained two heterozygous individuals for I148T [13], CFTR channel activity was reported as 87% of WT-CFTR. Other authors also reported normal protein processing and WT-like channel activity for I148T-CFTR in HEK293 cells but found that this variant suppresses the ability of CFTR to support HCO<sub>3</sub><sup>-</sup> transport, which led them to hypothesize that I148T may contribute to disease through Cl<sup>-</sup>-coupled HCO<sub>3</sub><sup>-</sup> altered transport [14].

D192G was first identified [15] in Slovenian CF patients. This is a drastic amino acid substitution, once the negatively charged aspartic acid, a well evolutionarily conserved residue [16], is replaced by the non-polar and small glycine residue. D192G is currently eligible for Trikafta, Symdeco, and Kalydeco.

G194R is a very rare mutation, reported in only 3 individuals worldwide according to CFTR2. In this case, the small and hydrophobic glycine is replaced by the basic arginine. This residue is localized in ICL2, where it is well embedded in the protein, in the small kink found in TM3. The first identification of G194R [17] was made in an African-American

female infant who also carries a 1341+1 G>A mutation and the 5T variant in intron 8. G194R is currently eligible for Trikafta, Symdeco, and Kalydeco.

H199Y is considered a severe CF-causing mutation, mainly because it is believed to be involved in inter-helix packing [2], since it is localized in a site of TM3 that is in close contact with TM1, where G85E, another severe CF-causing mutation, is localized. The presence of these mutations in TM1 and TM3 would disrupt the interaction between the two segments. G85E has indeed been shown to affect protein processing [18,19] and H199Y has probably a similar defect [20]. H199Y is currently eligible for Trikafta.

V201M changes a valine residue for a methionine in TM3. This mutation was first reported alone in a French patient with congenital bilateral absence of vas deferens (CBAVD) and then in Brazilian patients with CF[21]. Several studies have reported a link between CBAVD and the V201M mutation [22-24]. V201M is classified as a variant of unknown significance in CFTR2. This unknown significance can be assigned if variants have not yet been reported in a sufficient number of patients to allow proper classification or if they are found in a greater frequency in the healthy population [25]. The only study on the use of modulators in this variant [26] reports on the clinical benefit of Ivacaftor in a patient with the complex allele [R74W, V201M,D1270N]. Currently, V201M is eligible for Trikafta and Symdeco treatment [11,25].

In Q359R, the neutral polar glutamine is changed to the positively charged arginine. A recent clinical description of a heterozygous patient with Q359R/F508del shows typical CF sweat chloride values [16]. Q359R is currently eligible for treatment with Trikafta, Symdeco, and Kalydeco.

W361R mutation (c.1081T > A) was first detected in a French woman [27], and has also been reported in Spanish [28], Greek [29] and Swedish patients [30]. No information about this mutation is available in CFTR2. At the structural level, W361 is located within a class-II CF mutation hotspot that includes other mutations that induce variable disease severity. W361 is located in the TM6 helix, in a region where the elbow helix, TM1, TM3, and TM6 have close contacts forming a groove at the protein/membrane interface that can be stably occupied by lipid acyl chains [31]. W361R is currently eligible for Trikafta in the US.

In L558S, the hydrophobic leucine amino acid is replaced by polar and hydrophilic serine. L558S is registered in CFTR2 as a CF-causing mutation. This mutation affects the intermediate folding steps of NBD1 by disrupting the  $\alpha$ -core compaction of nascent NBD1 during a critical window of folding [32]. Currently, L558S is not eligible for any of the FDA-approved modulators.

Residue A559 is located in an  $\alpha$ -helical subdomain of NBD1 in a large hotspot of missense mutations at the NBD1: ICL4 interface [33]. Alanine is a small hydrophobic amino acid that is replaced by the acidic and hydrophilic glutamic acid and in the case of A559T by the polar and hydrophilic threonine. A559T has so far been found mainly in patients with CF of African American origin [34-36] and is registered in CFTR2 as a CF-causing mutation affecting 85 patients. Currently, none of the mutations in residue A559 (A559E, A559T and A559V) is eligible for treatment with FDA-approved modulators.



R560T is one of the most common CFTR mutations, particularly in the Northern Irish population [36]. Due to its prevalence, this mutation is well characterized. It lies in  $\alpha$ -helix (H5) within the ATP-binding cassette  $\alpha$ -subdomain of NBD1, in a hot spot for mutations between the signature (LSGGQ) and Walker B motifs [37]. According to previous reports [37,38] the side chain of R560 is partially buried in the tertiary structure of NBD1, and the mutation R560T likely disrupts the interactions of R560 with neighboring residues and therefore impacts the folding of NBD1. When expressed in COS-7[39] or BHK cells [37], R560T also abolished CFTR processing. The reverting mutation G550E, which can rescue the expression and function of the cell surface of F508del-CFTR, also failed to revert the defect caused by R560T [37]. This mutation is not eligible for treatment with any of the FDA-approved modulators. Other mutations in this residue – e.g. R560S and R560G – also cause severe disease, highlighting its importance for the global structure of CFTR.

## References

1. Liu, F.; Zhang, Z.; Csanady, L.; Gadsby, D.C.; Chen, J. Molecular Structure of the Human CFTR Ion Channel. *Cell* **2017**, *169*, 85-95 e88, doi:10.1016/j.cell.2017.02.024.
2. Baatallah, N.; Elbahnsi, A.; Mornon, J.P.; Chevalier, B.; Pranke, I.; Serval, N.; Zelli, R.; Decout, J.L.; Edelman, A.; Sermet-Gaudelus, I.; et al. Pharmacological chaperones improve intra-domain stability and inter-domain assembly via distinct binding sites to rescue misfolded CFTR. *Cell Mol Life Sci* **2021**, doi:10.1007/s00018-021-03994-5.
3. Ferec, C.; Novelli, G.; Verlingue, C.; Quere, I.; Dallapiccola, B.; Audrezet, M.P.; Mercier, B. Identification of six novel CFTR mutations in a sample of Italian cystic fibrosis patients. *Mol. Cell Probes*. **1995**, *9*, 135-137.
4. Loo, T.W.; Bartlett, M.C.; Clarke, D.M. Rescue of DeltaF508 and other misprocessed CFTR mutants by a novel quinazoline compound. *Mol Pharm* **2005**, *2*, 407-413, doi:10.1021/mp0500521.
5. Seibert, F.S.; Jia, Y.; Mathews, C.J.; Hanrahan, J.W.; Riordan, J.R.; Loo, T.W.; Clarke, D.M. Disease-associated mutations in cytoplasmic loops 1 and 2 of cystic fibrosis transmembrane conductance regulator impede processing or opening of the channel. *Biochemistry* **1997**, *36*, 11966-11974.
6. Bozon, D.; Zielenski, J.; Rininsland, F.; Tsui, L.C. Identification of four new mutations in the cystic fibrosis transmembrane conductance regulator gene: I148T, L1077P, Y1092X, 2183AA- ->G. *Hum. Mutat.* **1994**, *3*, 330-332.
7. Castaldo, G.; Rippa, E.; Raia, V.; Salvatore, D.; Massa, C.; de Ritis, G.; Salvatore, F. Clinical features of cystic fibrosis patients with rare genotypes. *J Med Genet* **1996**, *33*, 73-76, doi:10.1136/jmg.33.1.73.
8. Population variation of common cystic fibrosis mutations. The Cystic Fibrosis Genetic Analysis Consortium. *Hum Mutat* **1994**, *4*, 167-177, doi:10.1002/humu.1380040302.
9. Rohlf, E.M.; Zhou, Z.; Sugarman, E.A.; Heim, R.A.; Pace, R.G.; Knowles, M.R.; Silverman, L.M.; Allitto, B.A. The I148T CFTR allele occurs on multiple haplotypes: a complex allele is associated with cystic fibrosis. *Genet Med* **2002**, *4*, 319-323, doi:10.1097/00125817-200209000-00001.
10. Monaghan, K.G.; Highsmith, W.E.; Amos, J.; Pratt, V.M.; Roa, B.; Friez, M.; Pike-Buchanan, L.L.; Buyse, I.M.; Redman, J.B.; Strom, C.M.; et al. Genotype-phenotype correlation and frequency of the 3199del6 cystic fibrosis mutation among I148T carriers: results from a collaborative study. *Genet Med* **2004**, *6*, 421-425, doi:10.1097/01.GIM.0000139507.20179.3A.
11. Salvatore, D.; Pepe, A.; Carnovale, V.; Majo, F.; Padoan, R.; Quattrucci, S.; Salvatore, M.; Taruscio, D.; Amato, A.; Ferrari, G.; et al. Elexacaftor/tezacaftor/ivacaftor for CFTR variants giving rise to diagnostic uncertainty: Personalised medicine or over-medicalisation? *J Cyst Fibros* **2022**, *21*, 544-548, doi:10.1016/j.jcf.2021.09.011.
12. Caputo, A.; Hinzpeter, A.; Caci, E.; Pedemonte, N.; Arous, N.; Di Duca, M.; Zegarra-Moran, O.; Fanen, P.; Galletta, L.J. Mutation-specific potency and efficacy of cystic fibrosis transmembrane conductance regulator chloride

- channel potentiators. *J Pharmacol Exp Ther* **2009**, *330*, 783-791, doi:jpet.109.154146
13. Terlizzi, V.; Castaldo, G.; Salvatore, D.; Lucarelli, M.; Raia, V.; Angioni, A.; Carnovale, V.; Cirilli, N.; Casciaro, R.; Colombo, C.; et al. Genotype-phenotype correlation and functional studies in patients with cystic fibrosis bearing CFTR complex alleles. *J Med Genet* **2017**, *54*, 224-235, doi:10.1136/jmedgenet-2016-103985.
  14. Choi, J.Y.; Muallem, D.; Kiselyov, K.; Lee, M.G.; Thomas, P.J.; Muallem, S. Aberrant CFTR-dependent HCO<sub>3</sub><sup>-</sup> transport in mutations associated with cystic fibrosis. *Nature* **2001**, *410*, 94-97, doi:10.1038/35065099.
  15. Audrezet, M.P.; Canki-Klain, N.; Mercier, B.; Bracar, D.; Verlingue, C.; Ferec, C. Identification of three novel mutations (457 TAT-->G, D192G, Q685X) in the Slovenian CF patients. *Hum Genet* **1994**, *93*, 659-662, doi:10.1007/BF00201566.
  16. Zybert, K.; Wozniacki, L.; Tomaszewska-Sobczynska, A.; Wertheim-Tysarowska, K.; Czerska, K.; Oltarzewski, M.; Sands, D. Clinical characteristics of rare CFTR mutations causing cystic fibrosis in Polish population. *Pediatr Pulmonol* **2020**, *55*, 2097-2107, doi:10.1002/ppul.24823.
  17. Keiles, S.; Kammesheidt, A. Identification of CFTR, PRSS1, and SPINK1 mutations in 381 patients with pancreatitis. *Pancreas* **2006**, *33*, 221-227, doi:10.1097/01.mpa.0000232014.94974.75.
  18. Van Goor, F.; Yu, H.; Burton, B.; Hoffman, B.J. Effect of ivacaftor on CFTR forms with missense mutations associated with defects in protein processing or function. *J Cyst Fibros* **2014**, *13*, 29-36, doi:10.1016/j.jcf.2013.06.008.
  19. Decaestecker, K.; Decaestecker, E.; Castellani, C.; Jaspers, M.; Cuppens, H.; De Boeck, K. Genotype/phenotype correlation of the G85E mutation in a large cohort of cystic fibrosis patients. *Eur Respir J* **2004**, *23*, 679-684, doi:10.1183/09031936.04.00014804.
  20. Zhang, Z.; Chen, J. Atomic Structure of the Cystic Fibrosis Transmembrane Conductance Regulator. *Cell* **2016**, *167*, 1586-1597 e1589, doi:10.1016/j.cell.2016.11.014.
  21. Bernardino, A.L.; Ferri, A.; Passos-Bueno, M.R.; Kim, C.E.; Nakaie, C.M.; Gomes, C.E.; Damaceno, N.; Zatz, M. Molecular analysis in Brazilian cystic fibrosis patients reveals five novel mutations. *Genet Test* **2000**, *4*, 69-74, doi:10.1089/109065700316516.
  22. Wu, C.C.; Alper, O.M.; Lu, J.F.; Wang, S.P.; Guo, L.; Chiang, H.S.; Wong, L.J. Mutation spectrum of the CFTR gene in Taiwanese patients with congenital bilateral absence of the vas deferens. *Hum Reprod* **2005**, *20*, 2470-2475, doi:10.1093/humrep/dei077.
  23. Danziger, K.L.; Black, L.D.; Keiles, S.B.; Kammesheidt, A.; Turek, P.J. Improved detection of cystic fibrosis mutations in infertility patients with DNA sequence analysis. *Hum Reprod* **2004**, *19*, 540-546, doi:10.1093/humrep/deh134.
  24. Boudaya, M.; Fredj, S.H.; Haj, R.B.; Khrouf, M.; Bouker, A.; Halouani, L.; Messaoud, T. Cystic fibrosis transmembrane conductance regulator mutations and polymorphisms associated with congenital bilateral absence of vas deferens in a restricted group of patients from North Africa. *Ann Hum Biol* **2012**, *39*, 76-79, doi:10.3109/03014460.2011.642892.

25. Raraigh, K.S.; Lewis, M.H.; Collaco, J.M.; Corey, M.; Penland, C.M.; Stephenson, A.L.; Rommens, J.M.; Castellani, C.; Cutting, G.R. Caution advised in the use of CFTR modulator treatment for individuals harboring specific CFTR variants. *J Cyst Fibros* **2022**, *21*, 856-860, doi:10.1016/j.jcf.2022.04.019.
26. Arora, K.; Yang, F.; Brewington, J.; McPhail, G.; Cortez, A.R.; Sundaram, N.; Ramananda, Y.; Ogden, H.; Helmrath, M.; Clancy, J.P.; et al. Patient personalized translational tools in cystic fibrosis to transform data from bench to bed-side and back. *Am J Physiol Gastrointest Liver Physiol* **2021**, *320*, G1123-G1130, doi:10.1152/ajpgi.00095.2021.
27. Bienvenu, T.; Hubert, D.; Fonknechten, N.; Dusser, D.; Kaplan, J.C.; Beldjord, C. Unexpected inactivation of acceptor consensus splice sequence by a -3 C to T transition in intron 2 of the CFTR gene. *Hum.Genet.* **1994**, *94*, 65-68.
28. Alonso, M.J.; Heine-Suner, D.; Calvo, M.; Rosell, J.; Gimenez, J.; Ramos, M.D.; Telleria, J.J.; Palacio, A.; Estivill, X.; Casals, T. Spectrum of mutations in the CFTR gene in cystic fibrosis patients of Spanish ancestry. *Ann Hum Genet* **2007**, *71*, 194-201, doi:10.1111/j.1469-1809.2006.00310.x.
29. Kanavakis, E.; Tzetzis, M.; Antoniadis, T.; Traeger-Synodinos, J.; Doudounakis, S.; Adam, G.; Matsaniotis, N.; Kattamis, C. Mutation analysis of ten exons of the CFTR gene in Greek cystic fibrosis patients: characterization of 74.5% of CF alleles including one novel mutation. *Hum.Genet.* **1995**, *96*, 364-366.
30. Strandvik, B.; Bjorck, E.; Fallstrom, M.; Gronowitz, E.; Thountzouris, J.; Lindblad, A.; Markiewicz, D.; Wahlstrom, J.; Tsui, L.C.; Zielenski, J. Spectrum of mutations in the CFTR gene of patients with classical and atypical forms of cystic fibrosis from southwestern Sweden: identification of 12 novel mutations. *Genet Test* **2001**, *5*, 235-242, doi:10.1089/10906570152742290.
31. Gregory, R.J.; Rich, D.P.; Cheng, S.H.; Souza, D.W.; Paul, S.; Manavalan, P.; Anderson, M.P.; Welsh, M.J.; Smith, A.E. Maturation and function of cystic fibrosis transmembrane conductance regulator variants bearing mutations in putative nucleotide-binding domains 1 and 2. *Mol Cell Biol* **1991**, *11*, 3886-3893.
32. Shishido, H.; Yoon, J.S.; Yang, Z.; Skach, W.R. CFTR trafficking mutations disrupt cotranslational protein folding by targeting biosynthetic intermediates. *Nat Commun* **2020**, *11*, 4258, doi:10.1038/s41467-020-18101-8.
33. Callebaut, I.; Hoffmann, B.; Lehn, P.; Mornon, J.P. Molecular modelling and molecular dynamics of CFTR. *Cell Mol Life Sci* **2017**, *74*, 3-22, doi:10.1007/s00018-016-2385-9.
34. Stewart, C.; Pepper, M.S. Cystic Fibrosis in the African Diaspora. *Ann Am Thorac Soc* **2017**, *14*, 1-7, doi:10.1513/AnnalsATS.201606-481FR.
35. Vouk, K.; Strmecki, L.; Liovic, M.; Kopriva, S.; Micetic-Turk, D.; Komel, R. Mutational analysis of 30 Slovenian cystic fibrosis patients compared to known Slovenian and European CF mutation spectra. *Pflugers Arch* **2000**, *439*, R63-R65.
36. Castellani, C.; Cuppens, H.; Macek, M., Jr.; Cassiman, J.J.; Kerem, E.; Durie, P.; Tullis, E.; Assael, B.M.; Bombieri, C.; Brown, A.; et al. Consensus on the use and interpretation of cystic fibrosis mutation analysis in clinical practice. *J Cyst Fibros* **2008**, *7*, 179-196, doi:10.1016/j.jcf.2008.03.009.

37. Roxo-Rosa, M.; Xu, Z.; Schmidt, A.; Neto, M.; Cai, Z.; Soares, C.M.; Sheppard, D.N.; Amaral, M.D. Revertant mutants G550E and 4RK rescue cystic fibrosis mutants in the first nucleotide-binding domain of CFTR by different mechanisms. *Proc Natl Acad Sci U S A* **2006**, *103*, 17891-17896, doi:0608312103
38. Lewis, H.A.; Zhao, X.; Wang, C.; Sauder, J.M.; Rooney, I.; Noland, B.W.; Lorimer, D.; Kearins, M.C.; Connors, K.; Condon, B.; et al. Impact of the deltaF508 mutation in first nucleotide-binding domain of human cystic fibrosis transmembrane conductance regulator on domain folding and structure. *The Journal of biological chemistry* **2005**, *280*, 1346-1353, doi:10.1074/jbc.M410968200.
39. Lopes-Pacheco, M.; Sabirzhanova, I.; Rapino, D.; Morales, M.M.; Guggino, W.B.; Cebotaru, L. Correctors Rescue CFTR Mutations in Nucleotide-Binding Domain 1 (NBD1) by Modulating Proteostasis. *Chembiochem* **2016**, *17*, 493-505, doi:10.1002/cbic.201500620.

*Numbering as cited in the supplementary information; cited with independent numbering in the main text.*
